# Supplementary material for: Reconciling post-orogenic faulting, paleostress evolution, and structural inheritance in the seismogenic northern Apennines (Italy): insights from the Monti Martani Fault System
Source: Copernicus journal article supplement (doi:10.5194/se-15-1525-2024), 2024-12-20
Supplement: Supplementary file 1 [file se-15-1525-2024-supplement.pdf]

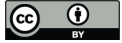

*Supplement of*

**Reconciling post-orogenic faulting, paleostress evolution, and structural inheritance in the seismogenic northern Apennines (Italy): insights from the Monti Martani Fault System**

**Riccardo Asti et al.**

*Correspondence to:* Riccardo Asti ([riccardo.asti2@unibo.it](mailto:riccardo.asti2@unibo.it))

The copyright of individual parts of the supplement might differ from the article licence.

**Table S1:** Location of structural stations with number and type of data collected

| Site n° | Locality                        | Latitude          | Longitude          | Data number |
|---------|---------------------------------|-------------------|--------------------|-------------|
| 1       | Viepri                          | N 42° 49' 51.373" | E 012° 31' 15.008" | 38          |
| 2       | Massa Martana (Monte Castro)    | N 42° 46' 52.559" | E 012° 33' 02.951" | 6           |
| 3       | Acquasparta (quarry)            | N 42° 40' 24.271" | E 012° 33' 25.502" | 11          |
| 4       | Poggio Azzuano                  | N 42° 37' 24.635" | E 012° 34' 12.472" | 42          |
| 5       | Poggio Azzuano                  | N 42° 37' 09.607" | E 012° 34' 20.333" | 9           |
| 6       | Cesi                            | N 42° 36' 42.534" | E 012° 35' 01.513" | 20          |
| 7       | Cesi                            | N 42° 36' 39.509" | E 012° 35' 02.279" | 26          |
| 8       | Cesi (Grotta Eolia)             | N 42° 36' 30.530" | E 012° 35' 12.480" | 27          |
| 9       | Cesi                            | N 42° 36' 19.106" | E 012° 35' 51.923" | 11          |
| 10      | Cesi (quarry)                   | N 42° 36' 18.339" | E 012° 36' 09.296" | 124         |
| 11      | Piedimonte (Madonna dell'Olivo) | N 42° 35' 59.432" | E 012° 37' 23.148" | 9           |
| 12      | La Croce                        | N 42° 35' 41.711" | E 012° 39' 56.370" | 12          |
| 13      | Fontana della Madonna           | N 42° 35' 39.459" | E 012° 40' 10.450" | 8           |
| 14      | Rocca San Zanone                | N 42° 35' 32.093" | E 012° 40' 33.144" | 6           |
| 15      | San Gemini                      | N 42° 36' 35.124" | E 012° 32' 58.784" | 17          |
| 16      | San Gemini (quarry)             | N 42° 36' 06.480" | E 012° 33' 32.610" | 11          |

| <b>Data type</b>        |
|-------------------------|
| Faults + Veins          |
| Faults                  |
| Faults                  |
| Faults + S-C structures |
| Faults                  |
| Faults                  |
| Faults + S-C structures |
| Faults                  |
| Fractures               |
| Faults                  |
